1

2

3 **Zinc oxide nanoparticles modulate the gene expression of ZnT<sub>1</sub> and ZIP<sub>8</sub> to manipulate zinc**  
4 **homeostasis and stress-induced cytotoxicity in human neuroblastoma SH-SY5Y cells**

5

6 Chien-Yuan Pan<sup>1</sup>, Fang-Yu Lin<sup>2</sup>, Lung-Sen Kao<sup>3,4</sup>, Chien-Chang Huang<sup>4</sup>, Pei-Shan Liu<sup>2\*</sup>

7

8 <sup>1</sup>Department of Life Science and Institute of Zoology, National Taiwan University, Taipei, Taiwan

9 <sup>2</sup>Department of Microbiology, Soochow University, Taipei, Taiwan

10 <sup>3</sup>Brain Research Center, National Yang-Ming University, Taipei, Taiwan

11 <sup>4</sup>Department of Life Sciences and Institute of Genome Sciences, National Yang-Ming University,  
12 Taipei, Taiwan

13

14 \*Correspondence: Dr. Pei-Shan Liu, Department of Microbiology, Soochow University,

15 No. 70, LinXi Road, Shihlin District, Taipei 111, Taiwan, R. O. C. Tel: 886-2-28819471 ext. 6857; Fax:

16 886-2-28831193 Email: [psliu@scu.edu.tw](mailto:psliu@scu.edu.tw).

18 **Abstract**

19 Zinc ions ( $Zn^{2+}$ ) are important messenger molecules involved in various physiological  
20 functions. To maintain the homeostasis of cytosolic  $Zn^{2+}$  concentration ( $[Zn^{2+}]_c$ ), Zrt/Irt-related  
21 proteins (ZIPs) and  $Zn^{2+}$  transporters (ZnTs) are the two families of proteins responsible for  
22 decreasing and increasing the  $[Zn^{2+}]_c$ , respectively, by fluxing  $Zn^{2+}$  across the membranes of the cell  
23 and intracellular compartments in opposite directions. Most studies focus on the cytotoxicity  
24 incurred by a high concentration of  $[Zn^{2+}]_c$  and less investigate the  $[Zn^{2+}]_c$  at physiological levels.  
25 Zinc oxide-nanoparticle (ZnO-NP) is blood brain barrier-permeable and elevates the  $[Zn^{2+}]_c$  to  
26 different levels according to the concentrations of ZnO-NP applied. In this study, we mildly elevated  
27 the  $[Zn^{2+}]_c$  by zinc oxide-nanoparticles (ZnO-NP) at concentrations below 1  $\mu\text{g/ml}$ , which had little  
28 cytotoxicity, in cultured human neuroblastoma SH-SY5Y cells and characterized the importance of  
29  $Zn^{2+}$  transporters in 6-hydroxy dopamine (6-OHDA)-induced cell death. The results show that ZnO-  
30 NP at low concentrations elevated the  $[Zn^{2+}]_c$  transiently in 6 hr, then declined gradually to a basal  
31 level in 24 hr. Knocking down the expression levels of  $ZnT_1$  (mostly at the plasma membrane) and  
32  $ZIP_8$  (present in endosomes and lysosomes) increased and decreased the ZnO-NP-induced elevation  
33 of  $[Zn^{2+}]_c$ , respectively. ZnO-NP treatment reduced the basal levels of reactive oxygen species and  
34 *Bax/Bcl-2* mRNA ratios; in addition, ZnO-NP decreased the 6-OHDA-induced ROS production, *p53*  
35 expression, and cell death. Therefore, mild elevations in  $[Zn^{2+}]_c$  induced by ZnO-NP activate  
36 beneficial effects in reducing the 6-OHDA-induced cytotoxic effects. Therefore, brain-delivery of  
37 ZnO-NP can be regarded as a potential therapy for neurological disease.

38

39

40 **Keywords:** neuroviability, zinc homeostasis, zinc oxide-nanoparticle, *ZIP\_8*, *ZnT\_1*, neurodegeneration

41

## 42 **Introduction**

43 Zinc ion ( $Zn^{2+}$ ) is essential for all living organisms and is the second most abundant transition  
44 element in human. It is a cofactor in many proteins regulating their catalytic activities and structure.  
45 In addition, recent emerging evidence has shown that  $Zn^{2+}$  is a messenger in regulation of many  
46 cellular activities such as cell cycle, cell proliferation, differentiation and death via different  
47 signaling pathways (1, 2). Cytosolic  $Zn^{2+}$  concentration ( $[Zn^{2+}]_c$ ) changes during cell cycle,  
48 differentiation and cell death (3). During cell proliferation, the tyrosine phosphatases are suppressed  
49 by a small elevation of  $[Zn^{2+}]_c$  to activate ERK pathway (4). A number of transcription factors, such  
50 as p53, contain  $Zn^{2+}$  binding motifs affecting cell cycle and survival (5).

51 The paradoxical, but vital roles of  $Zn^{2+}$  in nervous system have gained recognition recently (6,  
52 7).  $Zn^{2+}$  is essential for neurogenesis, neuronal differentiation and synaptic transmission. The  
53 inhibition of synaptic  $Zn^{2+}$  signaling in hippocampus and amygdala by  $Zn^{2+}$  chelators affects  
54 cognition (8).  $Zn^{2+}$  deficiency reduces neurogenesis and associates with neuronal dysfunction. A  
55 correlation between  $Zn^{2+}$  deficiency and depression has been demonstrated in both clinical studies  
56 and animal models (9, 10). In contrast, high  $Zn^{2+}$  levels block mitochondrial function and induce  
57 apoptosis in the development of pathophysiology of CNS disorders including epilepsy, schizophrenia  
58 and Alzheimer's Disease (11). At cellular level, high dose of  $Zn^{2+}$  is neurotoxic causing cell death  
59 (12-14) and  $Zn^{2+}$  deficiency causes caspase-dependent apoptosis in human neuronal precursor cells  
60 (15, 16).  $Zn^{2+}$  supplementation significantly reduces spinal cord ischemia-reperfusion injury in rats  
61 (17). However, dietary  $Zn^{2+}$  supplementation has restrictions and limitations in crossing brain-blood  
62 barrier (BBB), which has limited permeability for  $Zn^{2+}$ , especially when the desired final  $Zn^{2+}$  level  
63 is higher than physiological levels (18). Thus, controlled and targeted delivery of  $Zn^{2+}$  is highly  
64 desirable.

65 Nanoparticles (NP) technologies have been used for the targeted delivery of chemicals (19). In  
66 nervous system, polylactide-co-glycolide or BBB ligand specific-modified polylactide polymers are

67 used to carry  $Zn^{2+}$  across BBB (18, 19). However, the rate is slow, the cellular or brain entrance were  
68 evidenced after several days (19). We have previously demonstrated the entrance of zinc oxide-NP  
69 (ZnO-NP) into brain via olfactory bulb in rat and elevates the  $[Zn^{2+}]_c$  in cultured cells (20).  
70 Therefore, ZnO-NP has the potential to be a potent means for  $Zn^{2+}$  delivery to regulate  $[Zn^{2+}]_c$   
71 homeostasis in the central nervous system.

72 The cellular uptake of ZnO-NP into intracellular compartments is via endocytosis followed by  
73 dissolution that occurs in acidic compartments to convert ZnO-NP to  $Zn^{2+}$  (20). Two classes of  
74 proteins are implicated in  $Zn^{2+}$  transport for  $[Zn^{2+}]_c$  homeostasis: solute-linked carrier 30 (SLC30, Zn  
75 transporter (ZnT)) and SLC39 (Zrt/Irt-related proteins (ZIP)) decrease and increase the  $[Zn^{2+}]_c$ ,  
76 respectively, by fluxing  $Zn^{2+}$  across the membranes of cell and intracellular organelles in opposite  
77 directions. The ZIP proteins then transport the accumulated  $Zn^{2+}$  in these acidic compartments to the  
78 cytosol and ZnT proteins work corporately to flux  $Zn^{2+}$  out of the cytosol. Therefore, ZnO-NP may  
79 be different from direct  $Zn^{2+}$  application in regulating expression levels of  $Zn^{2+}$  transporters to  
80 control  $Zn^{2+}$  homeostasis.

81 ZnO-NP at high dosage causes apoptosis in lung (21) and neural stem cells (13) and interferes  
82 with the ion channel activities in primary cultured rat hippocampal neurons (22). However, toxicity  
83 is not seen under exposure to ZnO-NP at low doses, such as 6 ppm (70  $\mu$ M)(13), or 10  $\mu$ M (20). The  
84 importance of  $Zn^{2+}$  to normal functioning of the central nervous system is increasingly appreciated  
85 (9, 15). In this report, we mildly elevated the concentration of  $[Zn^{2+}]_c$  in human neuroblastoma cells,  
86 SH-SY5Y, by ZnO-NP at concentrations below 1  $\mu$ g/ml. ZnO-NP treatment greatly enhanced the  
87 expression level of ZnT<sub>1</sub> and less affected the expression of ZIP<sub>8</sub>. ZnO-NP treatment decreased the  
88 basal level of reactive oxygen species (ROS) and the expression ratio of Bax/Bcl-2. In addition,  
89 ZnO-NP treatment recued the cell death caused by the 6-hydroxy dopamine (6-OHDA). Therefore,  
90 BBB-permeable ZnO-NP provides a therapeutic strategy to treat neurodegeneration disorders by fin-  
91 tuning the  $[Zn^{2+}]_c$ .

## 92 **Materials and Methods**

### 93 **Chemicals**

94 ZnO-NP were purchased from Sigma-Aldrich Co. (St. Louis, MO, USA). Their preparation  
95 followed protocols described in our previous work (21). The size range of ZnO-NP in solution was  
96 from 20 to 80 nm with an average of 45 nm. SH-SY5Y neuroblastoma cells were purchased from the  
97 American Type Culture Centre CRL2266 (Manassas, VA, USA). FluoZin-3-AM, reverse  
98 transcriptase III, and TRIzol<sup>®</sup> reagent were purchased from Invitrogen Co. (Carlsbad, CA, USA).  
99 RNase-free DNase I and RNeasy purification columns were purchased from Qiagen Inc. (Valencia,  
100 CA, USA). Random hexamer primers were obtained from Fermentas Inc. (Burlington, Canada). iQ  
101 SYBR Green Supermix was obtained from Bio-Rad Inc. (Hercules, CA, USA). Other chemicals  
102 were obtained from Merck KGaA (Darmstadt, German) otherwise indicated.

### 103 **Cell culture**

104 Human neuroblastoma SH-SY5Y cells were cultured in minimal essential medium (Gibico  
105 41500-034) supplemented with F12 nutrient mixture (Gibico 21700-075) and 10% fetal bovine  
106 serum. The cells were kept in a humidified 5%-CO<sub>2</sub> incubator at 37 °C (20).

### 107 **[Zn<sup>2+</sup>]<sub>c</sub> Measurements**

108 Suspended cells were incubated in a Loading buffer (in mM, NaCl 150, glucose 5, Hepes 10,  
109 MgCl<sub>2</sub> 1, KCl 5, CaCl<sub>2</sub> 2.2, pH7.3) containing 10 μM of FluoZin-3-AM at 37°C for 30 minutes.  
110 After washing out the FluoZin-3-AM by centrifugation and resuspending the cell in Loading buffer,  
111 the changes in the fluorescence intensity were recorded as described before (20).

### 112 **RT-PCR assay**

113 RNA extraction and reverse transcription were performed following the protocols suggested by  
114 the manufactures. The primers for the polymerase chain reactions (PCR, Q-Amp<sup>™</sup> 2x HotStart PCR  
115 Master Mix) were listed in Supplementary Table S1. The products were separated by electrophoresis  
116 on 2% agarose gels, stained with ethidium bromide, and photographed with ultraviolet trans-

117 illumination. For quantitative PCR (qPCR), the kit used was IQ<sup>2</sup> Fast qPCR System and the  
118 instrument was from Illumina Inc. (Eco<sup>TM</sup> Real-time PCR system) (23).

### 119 **MTT assay**

120 The MTT assay, an index of cell viability and cell growth, is based on the ability of viable cells  
121 to reduce MTT (3-(4,5-dimethylthiazol-2-yl)-2,5-diphenyl tetrazolium bromide) (24). All samples  
122 were assayed in triplicate, and the mean for each experiment was calculated. Five batches of cells  
123 were used in this experiments.

### 124 **ROS measurements**

125 To quantify the production of ROS, we loaded the cells with 2',7'-dichlorodihydrofluorescein  
126 diacetate (H<sub>2</sub>DCFDA, Molecular Probes®) and incubated at 37°C, 5% CO<sub>2</sub> for 30 minutes. After  
127 replacing the medium, H<sub>2</sub>O<sub>2</sub> or 6-OHDA were added. The fluorescence intensities were measured by  
128 a microplate reader (Glomax-multidetecion system, Promega, USA) with excitation at 485 nm and  
129 emission at 500 - 560 nm.

### 130 ***ZIP<sub>8</sub>* and *ZnT<sub>1</sub>* shRNA knockdown**

131 Plasmids expressing short hairpin RNAs (shRNA) against *ZIP<sub>8</sub>* and *ZnT<sub>1</sub>* were purchased from  
132 National RNAi Core Facility, Academia Sinica, Taiwan, and the target sequences of these shRNAs  
133 (4 for *ZIP<sub>8</sub>* and 5 for *ZnT<sub>1</sub>*) were listed in Supplementary Table S2. Lipofectamine 2000® (Invitrogen,  
134 Carlsbad, CA) was used to transfect these plasmids into SH-SY5Y cells(25). An apoplasmid was  
135 used as negative control.

### 136 **Statistical analysis**

137 Statistical analysis was performed using one-way analysis of variance and significant  
138 differences were assessed by Student's *t* test. A *p* value less than 0.05 was regarded as statistically  
139 significant.

140

141

142 **Results:**

143 **1. ZnO-NP elevates  $[Zn^{2+}]_c$  in cultured SH-SY5Y cells**

144 To examine ZnO-NP at low doses can elevate  $[Zn^{2+}]_c$  in cultured human neuroblastoma  
145 SH-SY5Y cells, we loaded the cells with FluoZin3, a  $Zn^{2+}$ -sensitive dye, and monitored the  
146 changes in fluorescence intensities (Fig. 1). The addition of ZnO-NP (0.081 and 0.814  $\mu\text{g/ml}$ )  
147 increased the fluorescence intensity gradually during the 200-s recording period in a  
148 concentration-dependent manner. For 25-hr long-term treatment, the fluorescence intensities  
149 measured reached a maximum in 6 hr when treated with different concentrations of ZnO-NP  
150 (0.081, 0.814, and 8.14  $\mu\text{g/ml}$ ). These results reveal that ZnO-NP apparently elevates the  $[Zn^{2+}]_c$   
151 transiently in a concentration- and time-dependent mode even at low concentrations.

152  
153 **2. ZnT<sub>1</sub> and ZIP<sub>8</sub> regulate the ZnO-NP-induced  $[Zn^{2+}]_c$  responses in SH-SY5Y cells**

154 ZIPs and ZnTs play important roles in maintaining the  $[Zn^{2+}]_c$  homeostasis. We first  
155 characterized the expression levels of *ZnT* and *ZIP* isoforms in cultured SH-SY5Y cells by RT-  
156 PCR and the results showed significant expressions of *ZnT*<sub>1</sub>, *ZnT*<sub>3</sub>, *ZnT*<sub>4</sub>, *ZnT*<sub>5</sub>, *ZnT*<sub>6</sub>, *ZnT*<sub>7</sub>, *ZnT*<sub>9</sub>  
157 and *ZnT*<sub>10</sub> (Supplementary Fig. S1A) and *ZIP*<sub>1</sub>, *ZIP*<sub>3</sub>, *ZIP*<sub>4</sub>, *ZIP*<sub>6</sub>, *ZIP*<sub>7</sub>, *ZIP*<sub>8</sub>, *ZIP*<sub>9</sub>, *ZIP*<sub>10</sub>, *ZIP*<sub>11</sub>,  
158 *ZIP*<sub>13</sub> and *ZIP*<sub>14</sub> (Supplementary Fig. S1B). ZnT<sub>1</sub> is the main transporter at the plasma membrane  
159 to efflux  $Zn^{2+}$  out of cells and lowers the  $[Zn^{2+}]_c$  (26); ZIP<sub>8</sub> presents in the synaptic vesicles and  
160 lysosomes to transport  $Zn^{2+}$  from intracellular compartments to the cytosol (27, 28). Since  
161 endocytosis is the main route for ZnO-NP entrance into the cell and dissolution into  $Zn^{2+}$  occurs  
162 in an acidic compartment (20), we focused on characterizing the involvement of ZnT<sub>1</sub> and ZIP<sub>8</sub>  
163 in modulating the ZnO-NP-induced  $[Zn^{2+}]_c$  response in SH-SY5Y cells (Fig. 2). We adopted  
164 qPCR to investigate the mRNA levels of *ZnT*<sub>1</sub> and *ZIP*<sub>8</sub> in SH-SY5Y cells after the addition of  
165 ZnO-NP of different concentrations. The average results show that a low-dose of ZnO-NP (0.081  
166  $\mu\text{g/ml}$ ) elevated the expression levels of *ZnT*<sub>1</sub> and *ZIP*<sub>8</sub> transiently in 6 hr and then declined to a

167 basal level after 24 hrs. High doses of ZnO-NP (0.814 and 8.14  $\mu\text{g}/\text{ml}$ ) treatment maintained the  
168 expression of *ZnT<sub>1</sub>* at a level 4~8 fold higher than the control group during the 24-hour exposure  
169 period. ZnO-NP at 0.814  $\mu\text{g}/\text{ml}$  elevated and maintained the expression of *ZIP<sub>8</sub>* at a level 2-3 fold  
170 higher than the control group, however, at 8.14  $\mu\text{g}/\text{ml}$ , ZnO-NP had little effect on the expression  
171 of *ZIP<sub>8</sub>*. These results reveal that ZnO-NP exposure differentially enhances the expression of  
172 *ZnT<sub>1</sub>* and *ZIP<sub>8</sub>*.

173 To verify the contributions of these transporters in regulating the  $[\text{Zn}^{2+}]_c$  responses induced  
174 by ZnO-NP, we delivered specific shRNAs into the cells to reduce the translation of *ZnT<sub>1</sub>* and  
175 *ZIP<sub>8</sub>* (Fig. 2C & D, respectively). The results of the Western blots revealed that most of these  
176 shRNAs decreased the protein levels of *ZnT<sub>1</sub>* (H1-5) and *ZIP<sub>8</sub>* (H6-9); among them, H5 and H9  
177 were the most effective shRNAs in reducing the protein levels of *ZnT<sub>1</sub>*, by 88%, and *ZIP<sub>8</sub>*, by  
178 70%, respectively. Treating transfected SH-SY5Y cells with ZnO-NP (0.814  $\mu\text{g}/\text{ml}$ ), the  
179 averaged changes in  $[\text{Zn}^{2+}]_c$ , comparing to the control group, was about 4-fold higher in cells  
180 expressing H5 and mostly abolished in cells expressing H9 (Fig. 2E). It is likely that cells change  
181 the expression levels of these transporters to regulate the  $[\text{Zn}^{2+}]_c$  in response to different  
182 stimulations.

### 183 184 **3. ZnO-NP at a low dose increases the *Bax/Bcl-2* expression level**

185 To characterize the toxicity of ZnO-NP on SH-SY5Y cells, we treated the cells with  
186 different concentrations of ZnO-NP for 24 hr and monitored the viability by MTT assay (Fig.  
187 3A). The results show that ZnO-NP exposure reduced the viability in a dose dependent manner  
188 with an  $\text{EC}_{50}$  of  $6.8 \pm 0.2 \mu\text{g}/\text{ml}$ . Under 2  $\mu\text{g}/\text{ml}$ , ZnO-NP had little effect on cell viability. We  
189 then examined the expression levels of *Bax* and *Bcl-2* by qPCR in SH-SY5Y cells treated with  
190 ZnO-NP at 0.081 and 0.814  $\mu\text{g}/\text{ml}$  for 6 hr (Fig. 3C). The amounts of the PCR products  
191 expressed from *Bax* and *Bcl-2* decreased and increased, respectively, as the concentrations of



192 ZnO-NP increased; in contrast, ZnO-NP at 8.14  $\mu\text{g/ml}$  significantly increased the ratio to  $1.49 \pm$   
193 0.2. Therefore, that ZnO-NP at low non-lethal dose decreases the *Bax/Bcl-2* ratio indicating the  
194 blockage of apoptosis pathway.

195 ROS accumulation can trigger the expression of apoptosis-related genes. We then  
196 examined the intracellular ROS levels by loading the cells with H<sub>2</sub>DCFDA and monitored the  
197 changes in the fluorescence intensities in 2 hr (Supplementary Figure S2). For control cells  
198 without ZnO-NP treatment, the ROS level increased over the recording period; in the presence of  
199 ZnO-NP (0.081 and 0.814  $\mu\text{g/ml}$ ), the ROS levels at the same duration were lower than that of  
200 control group. These findings suggest that a low-dose exposure of ZnO-NP elicits beneficial  
201 effects in cells to reduce the oxidation stress and protect cells from death. b

202

#### 203 4. ZnO-NP counteracted stress-induced ROS generation and cell death in SH-SY5Y cells

204 The uptake of 6-OHDA, an analog of dopamine, into cells through dopamine transporters  
205 triggers the production of ROS and causes cell death. To verify ZnO-NP has a protective effect  
206 on the 6-OHDA-induced cell death, we pretreated the SH-SY5Y cells with a low dose of ZnO-  
207 NP (0.081 and 0.814  $\mu\text{g/ml}$ ), which showed little effect on cell death in 24 hr (Fig. 3A). We then  
208 added 6-OHDA and monitored the survival rate at 6 hr later (Fig. 4). The results show that 6-  
209 OHDA significantly caused cell death with a dose-dependent manner at 50 and 100  $\mu\text{M}$ . ZnO-NP  
210 pretreatment counteracted the 6-OHDA-induced cell death and became significant at 100  $\mu\text{M}$  of  
211 6-OHDA. In addition, ZnO-NP (0.081  $\mu\text{g/ml}$ ) pretreatment significantly suppresses the 6-  
212 OHDA-induced production of ROS. Similarly, ZnO-NP pretreatment reversed the effects of  
213 H<sub>2</sub>O<sub>2</sub> in cell survival and ROS production (Supplementary Figure S3). We then used RT-PCR to  
214 examine the expression level of *p53*, a transcription factor involved in the activation of apoptosis  
215 pathway, in SH-SY5Y cells (Fig. 4C). It is apparently that ZnO-NP pretreatment reduced the  
216 expression of *p53* enhanced by 6-OHDA. These results suggest that ZnO-NP at a concentration

217 below 1  $\mu\text{g/ml}$  suppresses the production of ROS and facilitates cell survival.

218

## 219 **5. ZnT1 and ZIP8 knockdown affected 6-OHDA-induced cytotoxicity**

220 To verify the importance of ZnO-NP-induced elevation of  $[\text{Zn}^{2+}]_c$  in protecting cells from  
221 death, we transfected the SH-SY5Y with shRNAs against *ZnT1* and *ZIP8*, then examined the cell  
222 viability under 6-OHDA treatment with MTT assay (Fig. 5). The results show that knockdown  
223 the expression of *ZnT1* recused the cell death caused by 6-OHDA to a level similar to that of the  
224 control group and the addition of ZnO-NP did not enhance any more. In contrast, *ZIP8*  
225 knockdown did not have such a protective effect in 6-OHDA-induced cell death and the addition  
226 of ZnO-NP did not reverse the toxic effect of 6-OHDA. As shown in Fig. 2E, knockdown the  
227 expression of *ZnT1* and *ZIP8* enhanced and suppressed the ZnO-NP-induced elevations of  $[\text{Zn}^{2+}]_c$ ,  
228 respectively. Therefore, the release of  $\text{Zn}^{2+}$  from the acidic compartments by *ZIP8* and the  
229 elevation of  $[\text{Zn}^{2+}]_c$  facilitated by *ZnT1* are important in enhancing the viability of cells under  
230 different challenges.

231

## 232 Discussion

233 This study finds that ZnO-NP potentially induced the expressions of *ZnT<sub>1</sub>* and *ZIP<sub>8</sub>* to modulate  
234  $[Zn^{2+}]_c$ , a crucial parameter for cytotoxicity in human neuroblastoma SH-SY5Y cells. Below lethal  
235 dosage under 1  $\mu\text{g/ml}$ , ZnO-NP transiently elevated the  $[Zn^{2+}]_c$  and decreased the *Bax/Bcl-2*  
236 expression ratio. In addition, ZnO-NP suppressed the cytotoxicity, ROS production and *p53* gene  
237 expression induced by 6-OHDA or  $H_2O_2$ . These results suggest the cell-protective function of ZnO-  
238 NP at low dosages against oxidative stresses and support a therapeutic strategy by delivering ZnO-  
239 NP into the CNS to suppress the development of neuropathological disorders.

240  $Zn^{2+}$  trafficking was investigated in these experiments. ZnO-NP-induced  $[Zn^{2+}]_c$  changes were  
241 studied in cells transfected with siRNA against *ZnT<sub>1</sub>* to illustrate the role of *ZnT<sub>1</sub>* for the efflux of  
242  $Zn^{2+}$ .  $[Zn^{2+}]_c$  and the expression of *ZnT<sub>1</sub>* were coupled; both showed increases under exposure to low  
243 dose ZnO-NP and returned to the basal levels after 24 hr. At high dosage (8.14  $\mu\text{g/ml}$ ), ZnO-NP  
244 induced a large increase in  $[Zn^{2+}]_c$ , coupled with an 8-fold increase in *ZnT<sub>1</sub>* mRNA (at 6 hr). In this  
245 case, both the expression level of *ZnT<sub>1</sub>* and  $[Zn^{2+}]_c$  remained high throughout the observation period.  
246 Moreover, neurotoxicity induced by 6-OHDA was suppressed in the *ZnT<sub>1</sub>*-knockdown cells. Our  
247 data show that  $[Zn^{2+}]_c$  changes are coupled with the *ZnT<sub>1</sub>* expression levels which are closely related  
248 to the neuron-protection activity of  $Zn^{2+}$ . *ZnT<sub>1</sub>* is known to be a plasma membrane protein that is  
249 enriched in postsynaptic dendritic spines and plays a role in  $Zn^{2+}$  homeostasis in synaptic neuron  
250 functions and diseases (29). Su *et al.* reported a positive correlation between *ZnT<sub>1</sub>* and  $Zn^{2+}$  content  
251 in the spinal cord (30), and *ZnT<sub>1</sub>* is shown to increase significantly with progression of Alzheimer's  
252 disease (31).

253 Our data suggest that changes in *ZnT<sub>1</sub>* expression can become a marker for  $[Zn^{2+}]_c$  disturbance  
254 associated with neurotoxicity. Other ZnTs such as *ZnT<sub>10</sub>*, at Golgi, is down-regulated by an  
255 elevation of extracellular  $Zn^{2+}$  in SH-SY5Y cells (32). IL-6 induces a down-regulation of *ZnT<sub>10</sub>* and  
256 enhances the accumulation of  $Mn^{2+}$  that might be correlated with Parkinson's disease (33). Further

257 studies on ZnTs, ZIPs, and metallothioneins (MTs), are required to understand their roles in  
258 modulating the Zn<sup>2+</sup> homeostasis.

259 We have previously demonstrated the internalization of ZnO-NP by PC12 cells upon exposure  
260 to the nanoparticles for 10 min. Furthermore, after nasal exposure to airborne ZnO-NP, the  
261 nanoparticles are found in rat brain under a transmission electron microscope (20). We also verify  
262 that ZnO-NP elevates [Zn<sup>2+</sup>]<sub>c</sub> in both cultured cells and rat white blood cells through endocytosis and  
263 subsequent dissolution in acidic compartments such as endosomes (21). Conversion of ZnO to ions  
264 following entrance into lysosomes has also been shown in the studies of Xia *et al.* in which the  
265 labeled ZnO was traced in BEAS-2B cells (34). Muller *et al.* also have demonstrated that ZnO  
266 dissolves rapidly in a lysosomal fluid at a pH of 5.2 (35).

267 ZIP<sub>8</sub> has been shown to be localized in the lysosomal membrane or in synaptosomes (27, 28).  
268 Our data show that ZnO-NP-induced [Zn<sup>2+</sup>]<sub>c</sub> changes are greatly suppressed in ZIP<sub>8</sub>-knockdowned  
269 cells, illustrating that ZIP<sub>8</sub> is required for intracellular Zn<sup>2+</sup> release from those organelles after ZnO-  
270 NP was engulfed, which may be the main route for ZnO in elevating [Zn<sup>2+</sup>]<sub>c</sub>. The mRNA levels of  
271 ZIP<sub>8</sub> and ZnT<sub>1</sub> were positively correlated with the changes in [Zn<sup>2+</sup>]<sub>c</sub> under exposure to ZnO-NP  
272 below 1 µg/ml. At a high dose of ZnO-NP (8.14 µg/ml), the expression of ZIP<sub>8</sub> was small in contrast  
273 to [Zn<sup>2+</sup>]<sub>c</sub> response and ZnT<sub>1</sub> expression. The low level of ZIP<sub>8</sub> prevent additional Zn<sup>2+</sup> fluxing to the  
274 cytosol and further cellular damage. These results suggest that there is a negative feedback between  
275 elevation of [Zn<sup>2+</sup>]<sub>c</sub> and the expression of ZIP<sub>8</sub>.

276 ROS is known to cause DNA damage that activates the p53-linked apoptosis pathway through  
277 phosphorylation by ATM. Bcl-2 has been shown to be coupled with the pro-survival pathway to  
278 counteract effects of mitochondrial damage induced by Bax. In addition, silencing the expression of  
279 ZnT<sub>1</sub>, but not ZIP<sub>8</sub>, can not only enhance the ZnO-NP-induced [Zn<sup>2+</sup>]<sub>c</sub> elevation but rescue the 6-  
280 OHDA-induced cell death. It is likely that [Zn<sup>2+</sup>]<sub>c</sub> response is a prerequisite for ZnO-NP to reduce  
281 stress-induced cytotoxicity by suppressing ROS generation and augmenting expression of bcl-2.

282  $Zn^{2+}$  has been widely shown as a potential antioxidant for suppression of apoptosis (36-43). In  
283 animal brain studies,  $Zn^{2+}$  treatment decreases the *Bax/Bcl-2* protein ratio (43); treating SH-SY5Y  
284 cells with a low dose of  $Zn^{2+}$  can reverse a stress-induced increment of DNA fragmentation (12).  
285  $Zn^{2+}$  deficiency has been shown to reduce stem cell proliferation, increase neuronal precursor  
286 apoptosis and impair neuronal differentiation (15, 44) as well as associate with neuronal dysfunction,  
287 such as attention-deficit hyperactivity disorder (9) and depression-like symptoms (45, 46). In  
288 contrast,  $Zn^{2+}$  supplementation can reduce the levels of ROS to prevent cardiomyocyte apoptosis and  
289 congenital heart defects (39); it also promotes the recovery of spinal cord function (17, 47).  $Zn^{2+}$  has  
290 a protective effect on renal ischemia-reperfusion injury by augmenting superoxide dismutase activity  
291 and lowering the *Bax/Bcl-2* expression ratio to reduce apoptosis (36). Our results support that ZnO-  
292 NP, at sub-lethal dosage, plays a protective role by reducing ROS generation and the expression of  
293 *Bax/Bcl-2*.

294 In this and previous studies, we show that ZnO-NP dose-dependently exert paradoxical  
295 protective and cytotoxic functions through their ability to alter  $[Zn^{2+}]_c$  and modulate the expression  
296 of *ZnT<sub>1</sub>* and *ZIP<sub>8</sub>*. Delivering ZnO-NP at a low dose into the central nervous system may provide a  
297 practical strategy to elevate the  $[Zn^{2+}]_c$  for potent neuroprotection. Further studies, both *in vivo* and  
298 *in vitro*, will be required using more sensitive and selective techniques to measure the homeostasis of  
299  $[Zn^{2+}]_c$  and to assess the feasibility of using ZnO-NP for clinical application.

300

### 301 **Acknowledgements**

302 We wish to thank Ms. Suzanne Hosier for English editing and Hui-Hsing Hung for the  $[Zn^{2+}]_c$   
303 measurements in normal neuronal cells. This work was supported by grants from Ministry of Science  
304 and Technology, Taiwan, R. O. C. (PSL: NSC 102-2320-B-031-001, MOST 104-2622-B-031-001-  
305 CC2, & MOST 104-2632-B-031-001; CYP: MOST 107-2320-B-002-052)

306

## Figure Legends

307 **Figure 1** ZnO-NP exposure induces a transient elevation of  $[Zn^{2+}]_c$  in SH-SY5Y cells. We loaded the  
308 cells with FluoZin-3 and monitored the changes of the fluorescence intensities from a group of  
309 suspended cells stimulated with different concentrations of ZnO-NPs. A. The short-term  $[Zn^{2+}]_c$   
310 responses. ZnO-NP (0, 0.081, and 0.814  $\mu\text{g/ml}$ ) were added at the beginning of the recording and the  
311 fluorescence intensities were normalized to the value at the time zero ( $F/F_0$ ). B. Long-term exposure  
312 of ZnO-NP. The fluorescence intensities from ZnO-NP-treated suspension cells were normalized to  
313 the control group without ZnO-NP treatment (Normalized  $[Zn^{2+}]_c$ ) at different time after ZnO-NP  
314 exposure. Data presented were Mean  $\pm$  SEM from 3 batches of cells.

315

316 **Figure 2** Knockdown the expressions of specific  $Zn^{2+}$  transporters interfere  $[Zn^{2+}]_c$  responses in SH-  
317 SY5Y cells. A. and B. The expression levels of *ZnT1* and *ZIP8*, respectively. Cells were treated with  
318 different concentrations of ZnO-NP for 0, 6 and 24 hr and the mRNA levels of *ZnT1* and *ZIP8* were  
319 analyzed by RT-PCR. The expression levels were normalized to that of  $\beta$ -actin. C. and D. Expression  
320 knockdown of *ZnT1* and *ZIP8*, respectively. Specific shRNAs against *ZnT1* (H1-5) and *ZIP8* (H6-9)  
321 were delivered into the cells for 1 day and the protein levels were examined by Western blot (upper  
322 panel). The intensities of each protein bands were normalized to that of  $\beta$ -actin (lower panel). E.  
323  $[Zn^{2+}]_c$  responses in transfected cells. Cells were transfected with H5 and H9 shRNAs for 1 day and  
324 then loaded with FluoZin3. The changes in the fluorescence intensities ( $\Delta F/F_0$ ) induced by ZnO-NP  
325 (0.814  $\mu\text{g/ml}$ ) were calculated. Data presented were Mean  $\pm$  S.E.M from 3 bathes of cells. \*\*\*:  $p <$   
326 0.001 (Student's *t*-test) when compared to the control group.

327

328

329

330 **Figure 3** Low-dose ZnO-NP exposure reduces basal apoptosis signal in SH-SY5Y cells. A. Dose-  
331 dependent cell viability. After a 24-hr ZnO-NP exposure at different concentrations, the cell viability  
332 was analyzed by an MTT assay. The dose-dependence were fitted by a Boltzmann equation with an  
333  $EC_{50}$  of  $6.8 \pm 0.2$   $\mu\text{g/ml}$ . Data presented were Mean  $\pm$  SEM from 15 batches of cells. B. The *Bax/Bcl-*  
334 *2* ratio. Cells were treated with ZnO-NP for 6 hr and then the mRNA were collected for RT-PCR to  
335 analyze the expression level (upper panel) of *Bax* and *Bcl-2*. The intensities of the PCR products  
336 were normalized to the level  $\beta$ -actin and then used to calculate the *Bax/Bcl-2* ratio (Lower panel).  
337 Data presented were Mean  $\pm$  S.E.M from 3 bathes of cells. \*\* and \*\*\*:  $p < 0.01$  and  $0.001$ ,  
338 respectively, by Student's *t*-test when compared to the control group.

339

340 **Figure 4** ZnO-NP suppresses 6-OHDA-induced cytotoxicity in SH-SY5Y cells. A. Cell viability.  
341 Cells were pretreated with ZnO-NP (0, 0.081, and 0.814  $\mu\text{g/ml}$ ) for 18 hr and then incubated with 6-  
342 OHDA (50 or 100  $\mu\text{M}$ ) for another 6 hr. The viability was measured by an MTT assay. B. ROS  
343 production. Cells were pretreated with or without ZnO-NP (0.081  $\mu\text{g/ml}$ ) for 2 hr, then 6-OHDA  
344 were added for another 1 hr. Data presented were Mean  $\pm$  SEM from 15 batches of cells. The  
345 significance were analyzed by Student's *t*-test; \*\* and \*\*\*:  $p < 0.01$  and  $0.001$ , respectively, when  
346 compared to the control group without 6-OHDA treatment or as indicated. C. *p53* mRNA levels.  
347 Cells were pretreated with ZnO-NP (0.081  $\mu\text{g/ml}$ ) for 18 hr and then incubated with 6-OHDA for 6  
348 hr. Cells were then harvested for RT-PCR and the density of *p53* products were normalized with that  
349 of  $\beta$ -actin and control group.

350

351 **Figure 5** ZnO-NP altered 6-OHDA-induced cytotoxicity in cells with transporter knockdown. H5  
352 and H9 snRNAs were transfected into SH-SY5Y cells for 24 hr to knock down *ZnT<sub>1</sub>* and *ZIP<sub>8</sub>*,  
353 respectively. Cells were pretreated with ZnO-NP of different concentrations for 16 hr and then 6-  
354 OHDA (50  $\mu\text{M}$ ) for another 6 hr. The cell viability was determined by MTT assay. Data presented

355 were Mean  $\pm$  SEM (n = 15) and the significance were analyzed by Student's *t*-test; \* and \*\*:  $p <$   
356 0.05 and 0.01, respectively, when compared to the group without 6-OHDA treatment.

357

358

359



360 **References**

- 361 1. Maret W. Zinc biochemistry: from a single zinc enzyme to a key element of life. *Advances in*  
362 *nutrition*. 2013;4(1):82-91.
- 363 2. Maret W. New perspectives of zinc coordination environments in proteins. *Journal of inorganic*  
364 *biochemistry*. 2012;111:110-6.
- 365 3. Li Y, Maret W. Transient fluctuations of intracellular zinc ions in cell proliferation. *Experimental*  
366 *cell research*. 2009;315(14):2463-70.
- 367 4. Krezel A, Maret W. Zinc-buffering capacity of a eukaryotic cell at physiological pZn. *Journal of*  
368 *biological inorganic chemistry : JBIC : a publication of the Society of Biological Inorganic*  
369 *Chemistry*. 2006;11(8):1049-62.
- 370 5. Cho Y, Gorina S, Jeffrey PD, Pavletich NP. Crystal structure of a p53 tumor suppressor-DNA  
371 *complex: understanding tumorigenic mutations*. *Science*. 1994;265(5170):346-55.
- 372 6. Sindreu C, Storm DR. Modulation of neuronal signal transduction and memory formation by  
373 *synaptic zinc*. *Frontiers in behavioral neuroscience*. 2011;5:68.
- 374 7. Kawada H, Blessing K, Kiyota T, Woolman T, Winchester L, Kador PF. Effects of multifunctional  
375 *antioxidants on mitochondrial dysfunction and amyloid-beta metal dyshomeostasis*. *Journal of*  
376 *Alzheimer's disease : JAD*. 2015;44(1):297-307.
- 377 8. Takeda A, Tamano H. Significance of the degree of synaptic Zn signaling in cognition.  
378 *Biometals : an international journal on the role of metal ions in biology, biochemistry, and*

- 379 medicine. 2015.
- 380 9. Lepping P, Huber M. Role of zinc in the pathogenesis of attention-deficit hyperactivity disorder:  
381 implications for research and treatment. *CNS drugs*. 2010;24(9):721-8.
- 382 10. Levenson CW, Morris D. Zinc and neurogenesis: making new neurons from development to  
383 adulthood. *Advances in nutrition*. 2011;2(2):96-100.
- 384 11. Marger L, Schubert CR, Bertrand D. Zinc: an underappreciated modulatory factor of brain  
385 function. *Biochemical pharmacology*. 2014;91(4):426-35.
- 386 12. An WL, Pei JJ, Nishimura T, Winblad B, Cowburn RF. Zinc-induced anti-apoptotic effects in SH-  
387 SY5Y neuroblastoma cells via the extracellular signal-regulated kinase 1/2. *Brain research*  
388 *Molecular brain research*. 2005;135(1-2):40-7.
- 389 13. Deng X, Luan Q, Chen W, Wang Y, Wu M, Zhang H, et al. Nanosized zinc oxide particles induce  
390 neural stem cell apoptosis. *Nanotechnology*. 2009;20(11):115101.
- 391 14. Kim JH, Jeong MS, Kim DY, Her S, Wie MB. Zinc oxide nanoparticles induce lipoxygenase-  
392 mediated apoptosis and necrosis in human neuroblastoma SH-SY5Y cells. *Neurochemistry*  
393 *international*. 2015;90:204-14.
- 394 15. Szewczyk B. Zinc homeostasis and neurodegenerative disorders. *Frontiers in aging*  
395 *neuroscience*. 2013;5:33.
- 396 16. Gower-Winter SD, Corniola RS, Morgan TJ, Jr., Levenson CW. Zinc deficiency regulates  
397 hippocampal gene expression and impairs neuronal differentiation. *Nutritional neuroscience*.

- 398 2013;16(4):174-82.
- 399 17. Wang Y, Su R, Lv G, Cao Y, Fan Z, Wang Y, et al. Supplement zinc as an effective treatment for  
400 spinal cord ischemia/reperfusion injury in rats. *Brain research*. 2014;1545:45-53.
- 401 18. Grabrucker AM, Rowan M, Garner CC. Brain-Delivery of Zinc-Ions as Potential Treatment for  
402 Neurological Diseases: Mini Review. *Drug delivery letters*. 2011;1(1):13-23.
- 403 19. Grabrucker AM, Garner CC, Boeckers TM, Bondioli L, Ruozi B, Forni F, et al. Development of  
404 novel Zn<sup>2+</sup> loaded nanoparticles designed for cell-type targeted drug release in CNS neurons:  
405 in vitro evidences. *PloS one*. 2011;6(3):e17851.
- 406 20. Kao YY, Cheng TJ, Yang DM, Wang CT, Chiung YM, Liu PS. Demonstration of an Olfactory Bulb-  
407 Brain Translocation Pathway for ZnO Nanoparticles in Rodent Cells In Vitro and In Vivo. *Journal*  
408 *of molecular neuroscience : MN*. 2012;48(2):464-71.
- 409 21. Kao YY, Chen YC, Cheng TJ, Chiung YM, Liu PS. Zinc oxide nanoparticles interfere with zinc ion  
410 homeostasis to cause cytotoxicity. *Toxicol Sci*. 2012;125(2):462-72.
- 411 22. Zhao J, Xu L, Zhang T, Ren G, Yang Z. Influences of nanoparticle zinc oxide on acutely isolated  
412 rat hippocampal CA3 pyramidal neurons. *Neurotoxicology*. 2009;30(2):220-30.
- 413 23. Bustin SA, Benes V, Garson JA, Hellemans J, Huggett J, Kubista M, et al. The MIQE guidelines:  
414 minimum information for publication of quantitative real-time PCR experiments. *Clinical*  
415 *chemistry*. 2009;55(4):611-22.
- 416 24. Gerlier D, Thomasset N. Use of MTT colorimetric assay to measure cell activation. *Journal of*

- 417 immunological methods. 1986;94(1-2):57-63.
- 418 25. Yuan SS, Hou MF, Hsieh YC, Huang CY, Lee YC, Chen YJ, et al. Role of MRE11 in cell proliferation,  
419 tumor invasion, and DNA repair in breast cancer. *J Natl Cancer Inst.* 2012;104(19):1485-502.
- 420 26. Zhong ML, Chi ZH, Shan ZY, Teng WP, Wang ZY. Widespread expression of zinc transporter ZnT  
421 (SLC30) family members in mouse endocrine cells. *Histochemistry and cell biology.*  
422 2012;138(4):605-16.
- 423 27. Aydemir TB, Liuzzi JP, McClellan S, Cousins RJ. Zinc transporter ZIP8 (SLC39A8) and zinc  
424 influence IFN-gamma expression in activated human T cells. *Journal of leukocyte biology.*  
425 2009;86(2):337-48.
- 426 28. Lichten LA, Cousins RJ. Mammalian zinc transporters: nutritional and physiologic regulation.  
427 *Annual review of nutrition.* 2009;29:153-76.
- 428 29. Sindreu C, Bayes A, Altafaj X, Perez-Clausell J. Zinc transporter-1 concentrates at the  
429 postsynaptic density of hippocampal synapses. *Molecular brain.* 2014;7:16.
- 430 30. Su R, Mei X, Wang Y, Zhang L. Regulation of zinc transporter 1 expression in dorsal horn of  
431 spinal cord after acute spinal cord injury of rats by dietary zinc. *Biological trace element*  
432 *research.* 2012;149(2):219-26.
- 433 31. Beyer N, Coulson DT, Heggarty S, Ravid R, Hellemans J, Irvine GB, et al. Zinc transporter mRNA  
434 levels in Alzheimer's disease postmortem brain. *Journal of Alzheimer's disease : JAD.*  
435 2012;29(4):863-73.

- 436 32. Bosomworth HJ, Thornton JK, Coneyworth LJ, Ford D, Valentine RA. Efflux function, tissue-  
437 specific expression and intracellular trafficking of the Zn transporter ZnT10 indicate roles in  
438 adult Zn homeostasis. *Metallomics : integrated biometal science*. 2012;4(8):771-9.
- 439 33. Fujishiro H, Yoshida M, Nakano Y, Himeno S. Interleukin-6 enhances manganese accumulation  
440 in SH-SY5Y cells: implications of the up-regulation of ZIP14 and the down-regulation of ZnT10.  
441 *Metallomics : integrated biometal science*. 2014;6(4):944-9.
- 442 34. Xia T, Kovochich M, Liong M, Madler L, Gilbert B, Shi H, et al. Comparison of the mechanism of  
443 toxicity of zinc oxide and cerium oxide nanoparticles based on dissolution and oxidative stress  
444 properties. *ACS nano*. 2008;2(10):2121-34.
- 445 35. Muller KH, Kulkarni J, Motskin M, Goode A, Winship P, Skepper JN, et al. pH-dependent toxicity  
446 of high aspect ratio ZnO nanowires in macrophages due to intracellular dissolution. *ACS nano*.  
447 2010;4(11):6767-79.
- 448 36. Guo L, Li P, Meng C, Lu R, Yang Y, Zhou Y, et al. Protective effect of zinc on mouse renal  
449 ischemia-reperfusion injury by anti-apoptosis and antioxidation. *Current pharmaceutical*  
450 *biotechnology*. 2014;15(6):577-82.
- 451 37. Zheng J, Zhang Y, Xu W, Luo Y, Hao J, Shen XL, et al. Zinc protects HepG2 cells against the  
452 oxidative damage and DNA damage induced by ochratoxin A. *Toxicology and applied*  
453 *pharmacology*. 2013;268(2):123-31.
- 454 38. Li B, Tan Y, Sun W, Fu Y, Miao L, Cai L. The role of zinc in the prevention of diabetic

- 455 cardiomyopathy and nephropathy. *Toxicology mechanisms and methods*. 2013;23(1):27-33.
- 456 39. Kumar SD, Vijaya M, Samy RP, Dheen ST, Ren M, Watt F, et al. Zinc supplementation prevents  
457 cardiomyocyte apoptosis and congenital heart defects in embryos of diabetic mice. *Free radical  
458 biology & medicine*. 2012;53(8):1595-606.
- 459 40. Huang YZ, McNamara JO. Neuroprotective effects of reactive oxygen species mediated by  
460 BDNF-independent activation of TrkB. *The Journal of neuroscience : the official journal of the  
461 Society for Neuroscience*. 2012;32(44):15521-32.
- 462 41. Bosco MD, Mohanasundaram DM, Drogemuller CJ, Lang CJ, Zalewski PD, Coates PT. Zinc and  
463 zinc transporter regulation in pancreatic islets and the potential role of zinc in islet  
464 transplantation. *The review of diabetic studies : RDS*. 2010;7(4):263-74.
- 465 42. Ohly P, Dohle C, Abel J, Seissler J, Gleichmann H. Zinc sulphate induces metallothionein in  
466 pancreatic islets of mice and protects against diabetes induced by multiple low doses of  
467 streptozotocin. *Diabetologia*. 2000;43(8):1020-30.
- 468 43. Singla N, Dhawan DK. Zinc down regulates Apaf-1-dependent Bax/Bcl-2 mediated caspases  
469 activation during aluminium induced neurotoxicity. *Biometals : an international journal on the  
470 role of metal ions in biology, biochemistry, and medicine*. 2015;28(1):61-73.
- 471 44. Adamo AM, Oteiza PI. Zinc deficiency and neurodevelopment: the case of neurons. *BioFactors*.  
472 2010;36(2):117-24.
- 473 45. Tassabehji NM, Corniola RS, Alshingiti A, Levenson CW. Zinc deficiency induces depression-like

474 symptoms in adult rats. *Physiology & behavior*. 2008;95(3):365-9.

475 46. Whittle N, Lubec G, Singewald N. Zinc deficiency induces enhanced depression-like behaviour

476 and altered limbic activation reversed by antidepressant treatment in mice. *Amino acids*.

477 2009;36(1):147-58.

478 47. Wang Y, Me X, Zhang L, Lv G. Supplement moderate zinc as an effective treatment for spinal

479 cord injury. *Medical hypotheses*. 2011;77(4):589-90.

480

481

Figure 1

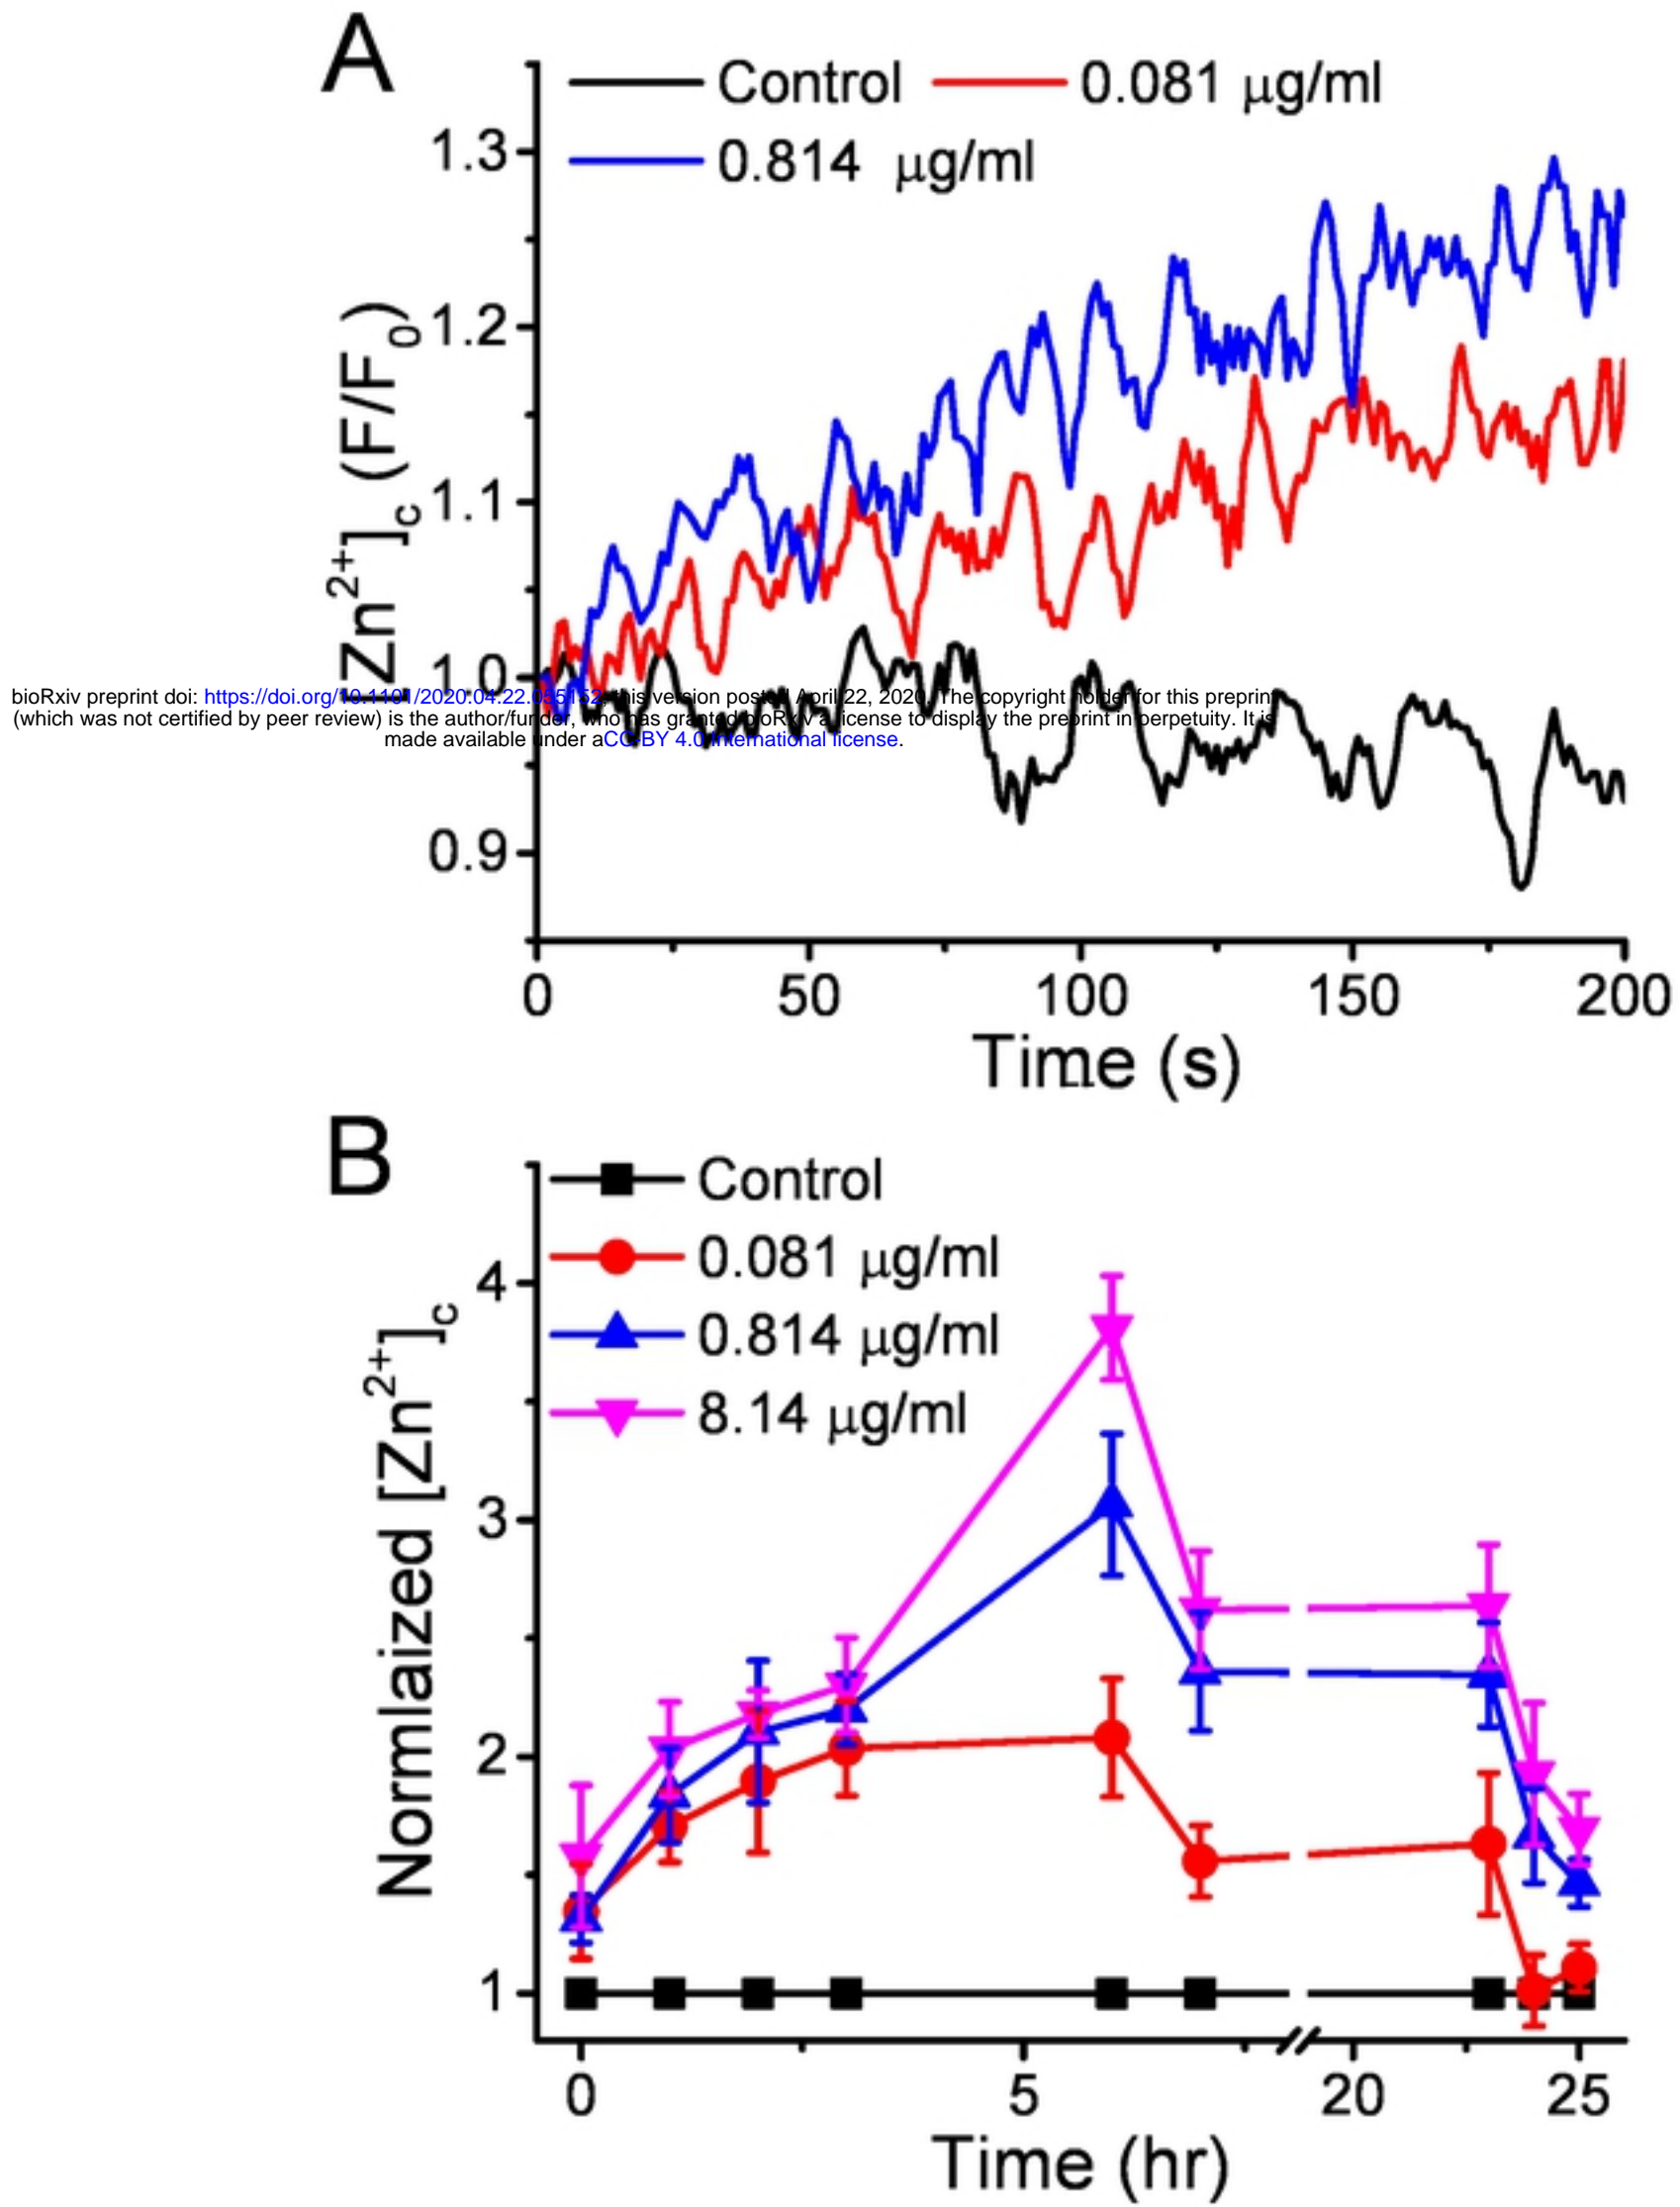



Figure 2

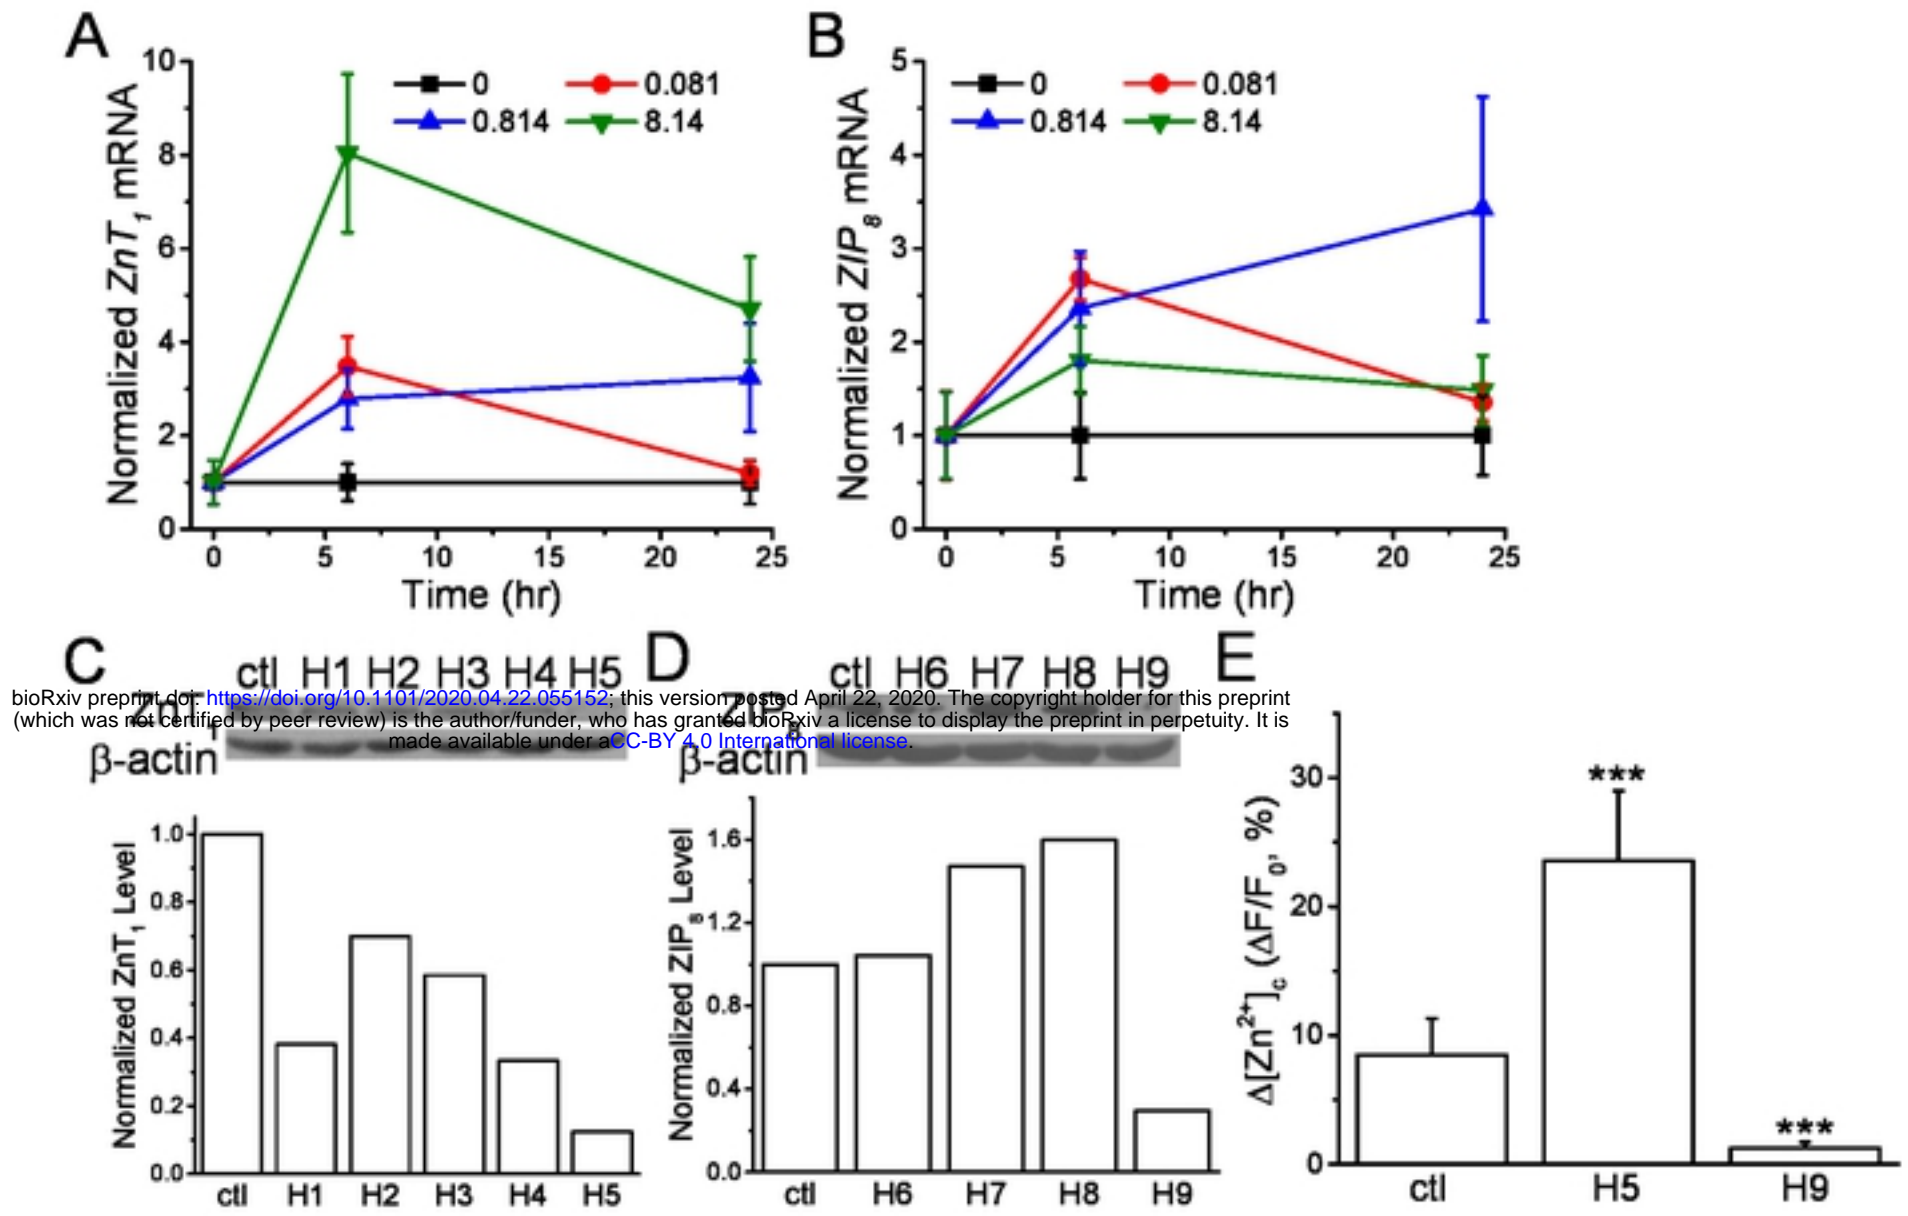

Figure 3

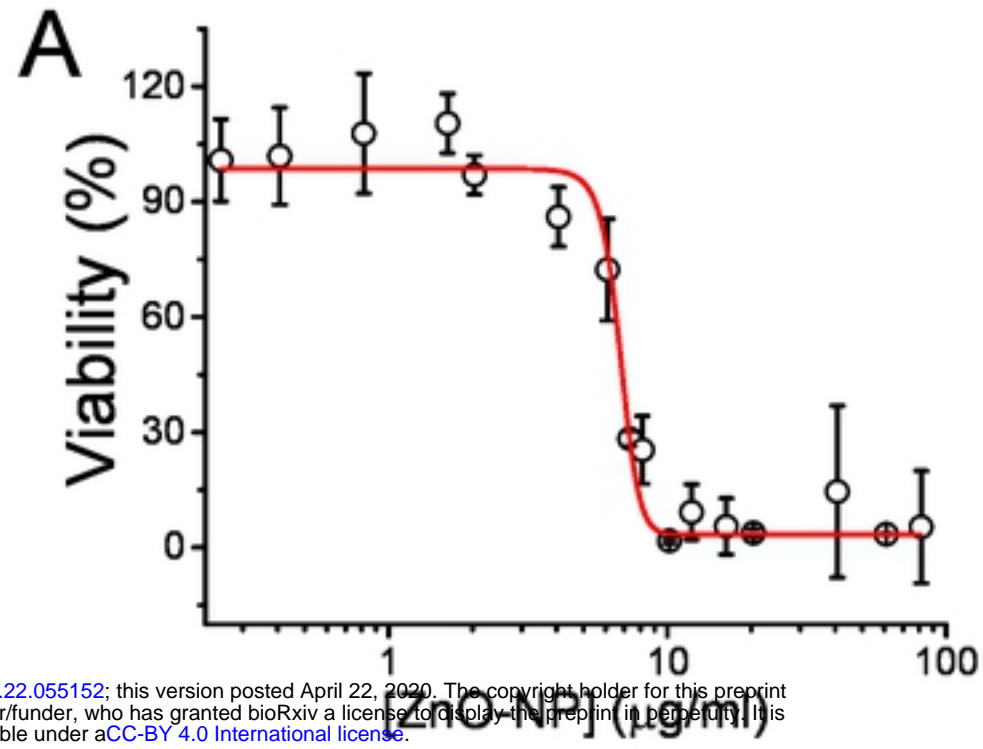

bioRxiv preprint doi: <https://doi.org/10.1101/2020.04.22.055152>; this version posted April 22, 2020. The copyright holder for this preprint (which was not certified by peer review) is the author/funder, who has granted bioRxiv a license to display the preprint in perpetuity. It is made available under aCC-BY 4.0 International license.

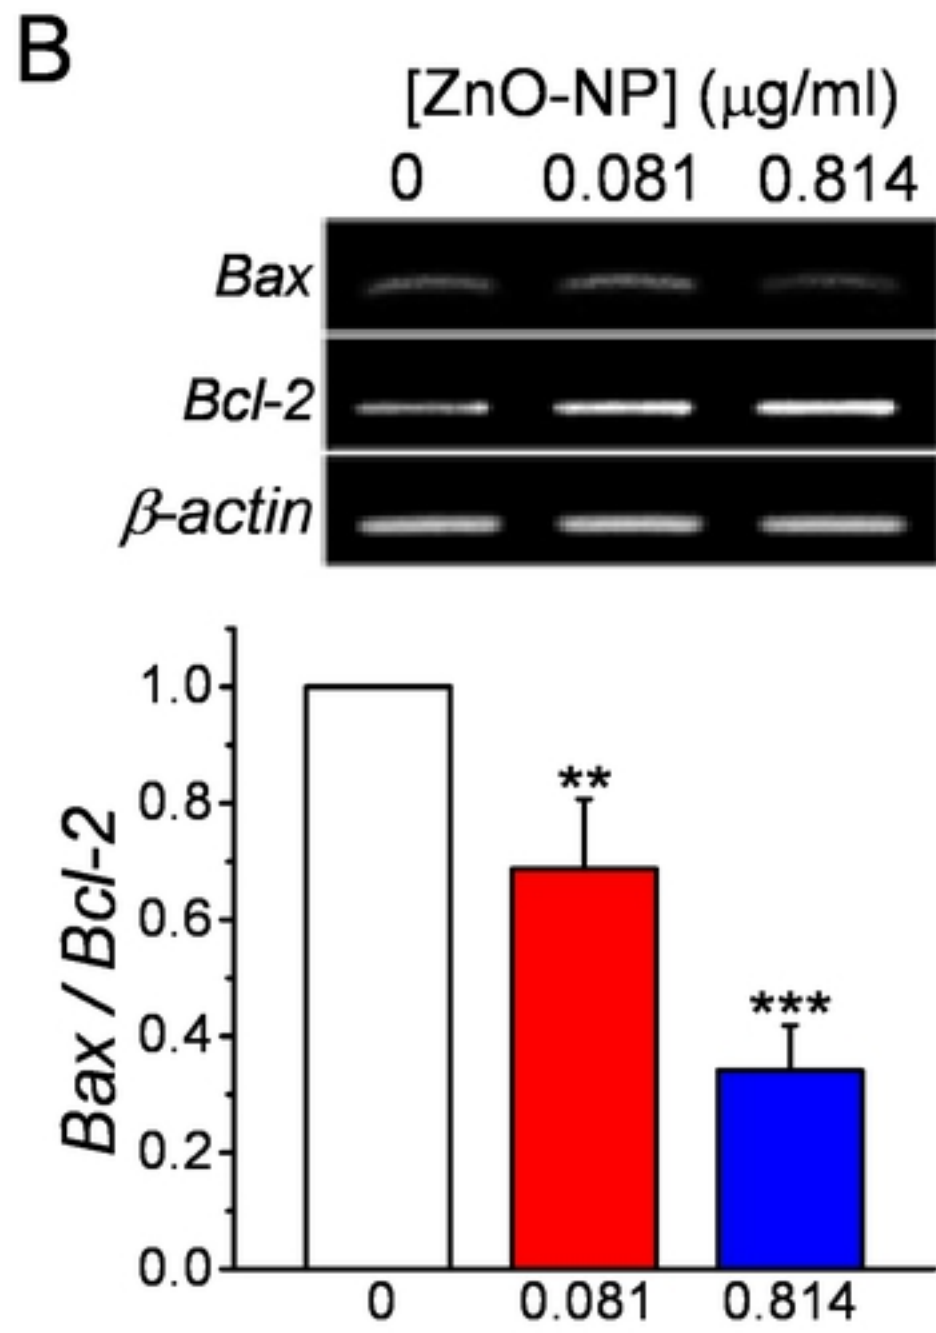

Figure 4

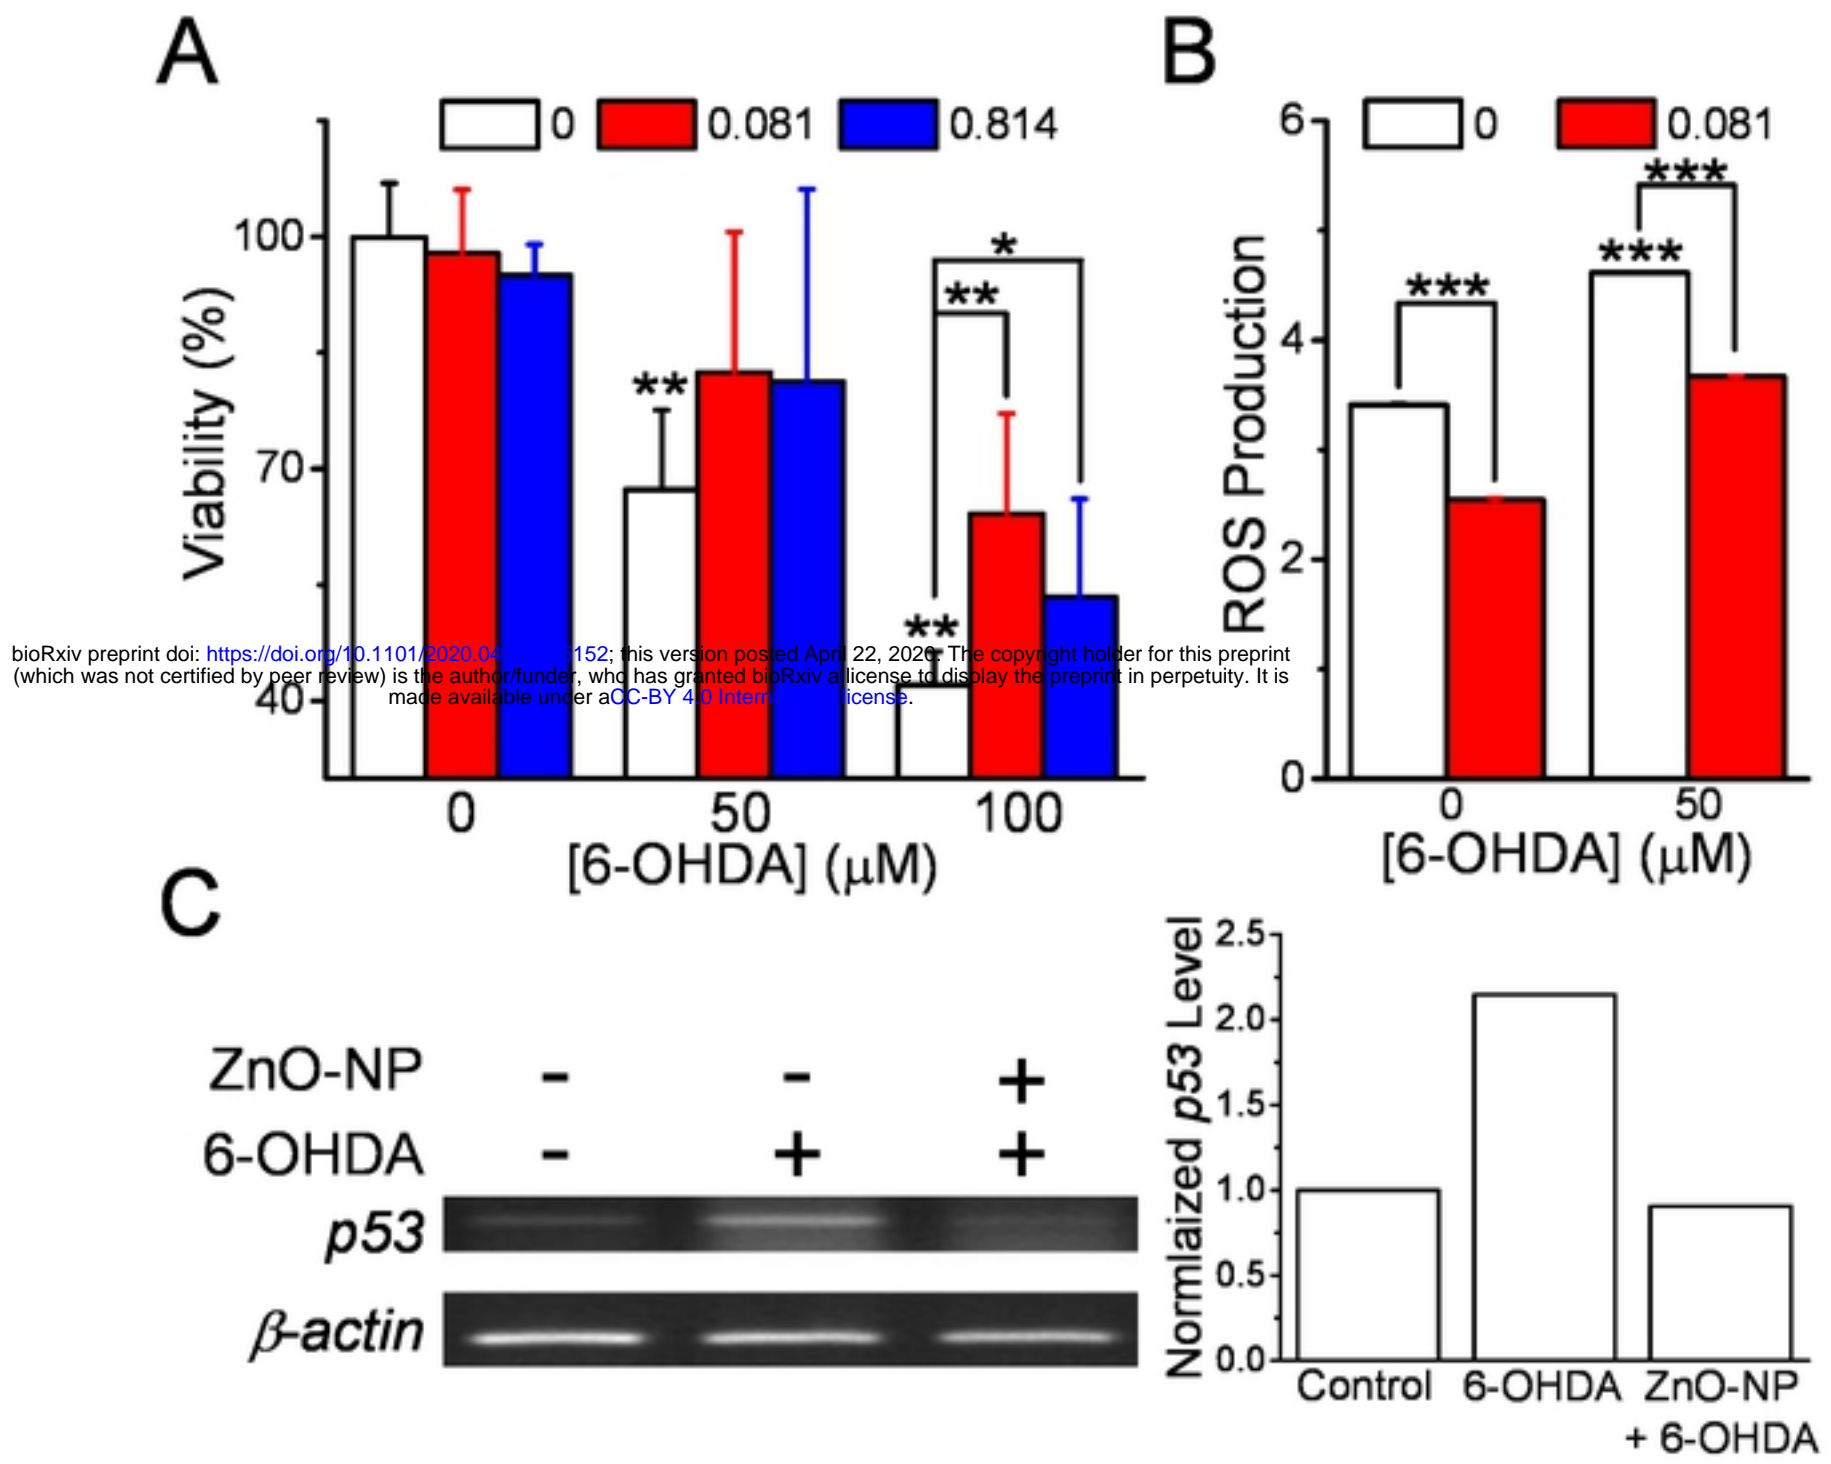

Figure 5

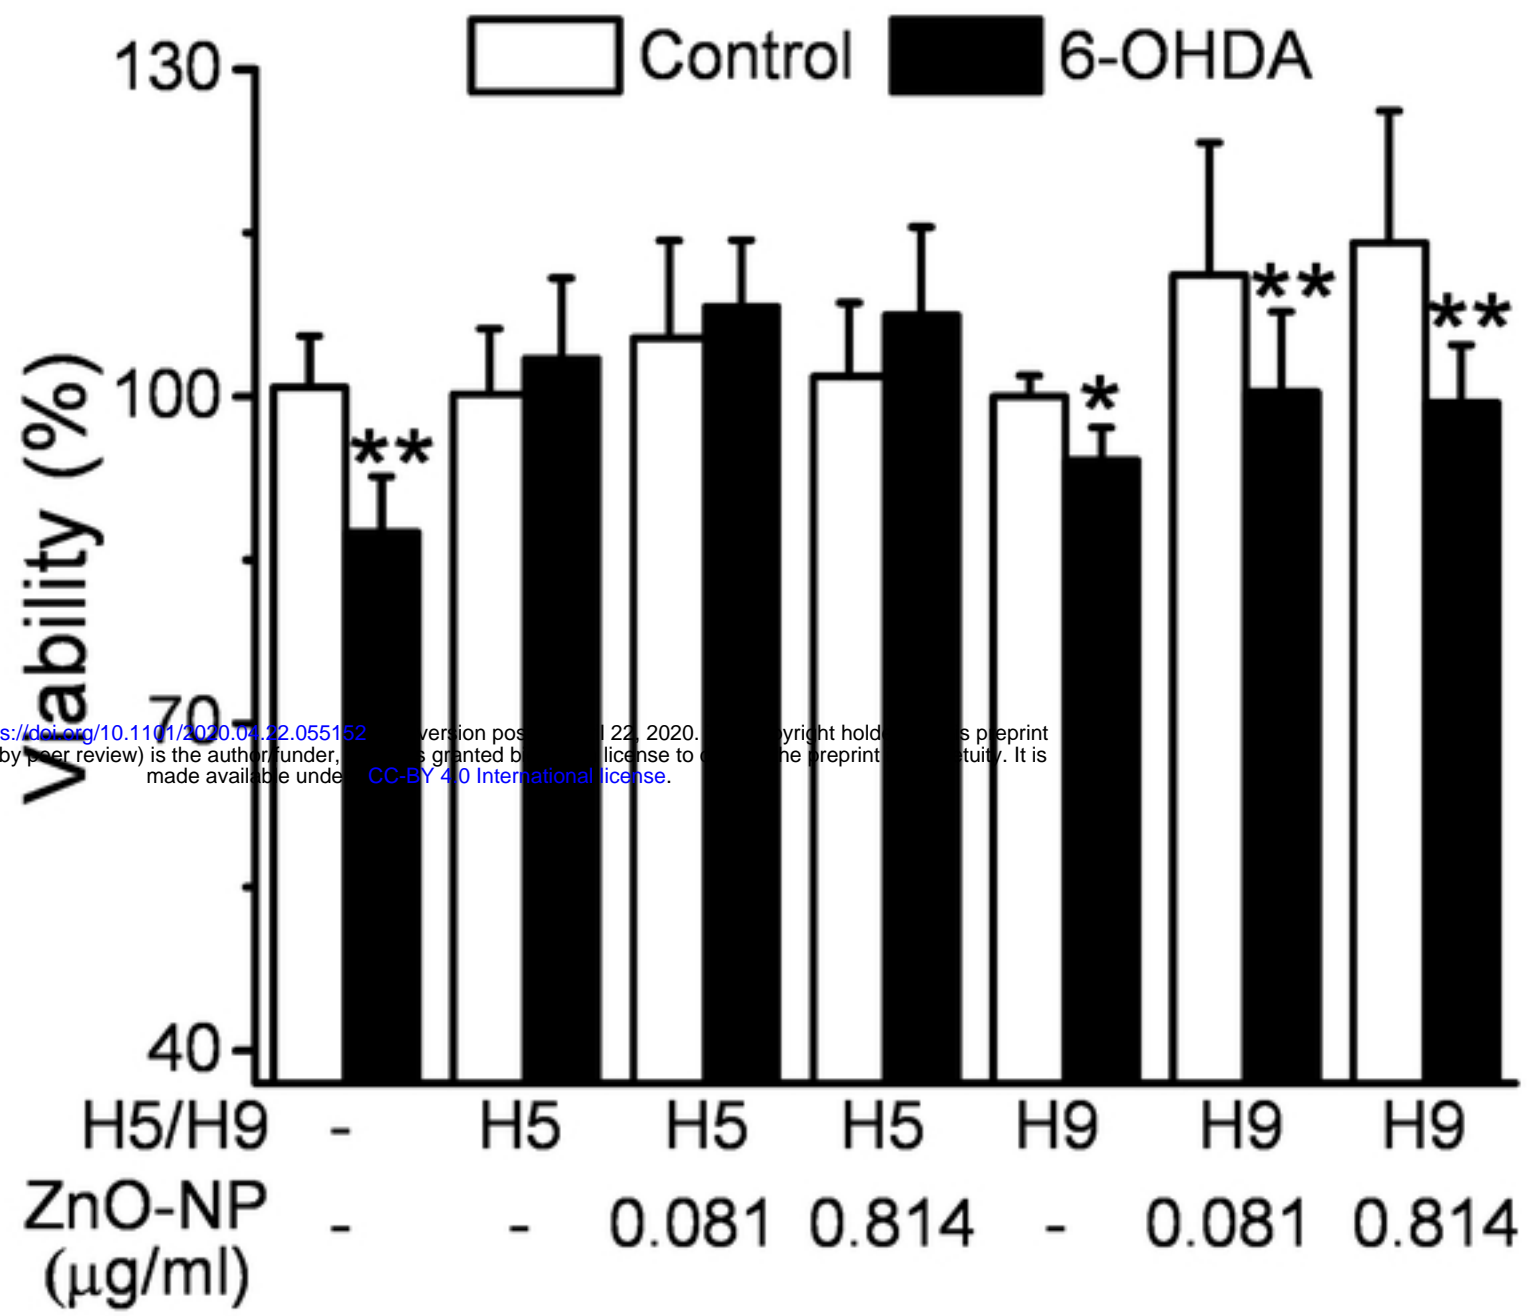

Source: https://www.biorxiv.org/content/biorxiv/early/2020/04/22/2020.04.22.055152.full.pdf
